# Supplementary material for: Long-Term Follow-Up after Mycobacterium Chimaera Infection Following Cardiac Surgery: Single-Center Experience
Source: MDPI journal article supplement (doi:10.3390/jcm12030948), 2023-01-26
Supplement: s1 [file s1]

**Supplementary Table S1.** Detailed surgical management.

| Case n° | Redo cardiac surgery                                                                             | Substitute                                  | CPB arterial cannulation site | CPB Time (min) | Aortic cross-clamp time (min) | Circulatory arrest time (min) | Extracorporeal cytokine adsorber | Second redo cardiac surgery                             | Substitute              |
|---------|--------------------------------------------------------------------------------------------------|---------------------------------------------|-------------------------------|----------------|-------------------------------|-------------------------------|----------------------------------|---------------------------------------------------------|-------------------------|
| 1       | Aortic root replacement<br>Permanent epicardial PM implantation                                  | Aortic homograft                            | Aorta                         | 138            | 118                           | NA                            | No                               | NA                                                      |                         |
| 2       | Aortic root replacement                                                                          | Aortic homograft                            | Aorta                         | 160            | 141                           | NA                            | No                               | NA                                                      |                         |
| 3       | Annuloplasty ring and Gore –Tex neo-chordae extraction<br>Mitral valve reconstruction            | Annuloplasty ring<br>Gore-Tex neo-chorda    | Femoral artery                | 323            | 200                           | NA                            | Yes                              | Annuloplasty ring extraction<br>Mitral chordae transfer | Autologous              |
| 4       | Aortic root, AA, and hemiarch replacement<br>Permanent PM extraction, epicardial PM implantation | Aortic homograft<br>Bovine pericardial tube | Aorta                         | 367            | 272                           | 22                            | Yes                              | NA                                                      |                         |
| 5       | Aortic root, AA, and hemiarch replacement                                                        | Aortic homograft<br>Bovine pericardial tube | Aorta                         | 161            | 137                           | 10                            | Yes                              | NA                                                      |                         |
| 6       | Aortic root and AA replacement                                                                   | Aortic homograft                            | Aorta                         | 193            | 164                           | NA                            | Yes                              | NA                                                      |                         |
| 7       | AA and hemiarch replacement                                                                      | Aortic homograft                            | Right axillary artery         | 133            | 66                            | 14                            | Yes                              | Distal AA replacement                                   | Bovine pericardial tube |

PM: pacemaker

AA: ascending aorta

CPB: cardiopulmonary bypass

NA: not applicable
